# Supplementary material for: Gfap and Osmr regulation by BRG1 and STAT3 via interchromosomal gene clustering in astrocytes
Source: PubMed Central journal article supplement — Mol Biol Cell. 2018 Jan 15;29(2):209–19. doi: 10.1091/mbc.E17-05-0271 (PMC5909932; doi:10.1091/mbc.e17-05-0271), 2018-01-15
Supplement: mbc-29-209-s001.pdf [file mbc-29-209-s001.pdf]

# Supplemental Materials

*Molecular Biology of the Cell*

Ito et al.

Supplementary Table 1. Primer sequences

| <b>RT-qPCR</b>     |          |                           |
|--------------------|----------|---------------------------|
| Name               | Fw or Rv | Sequence(5'→3')           |
| Gfap mRNA, premRNA | Fw       | ATCGAGATCGCCACCTACAG      |
| Gfap mRNA          | Rv       | CTCAGATCACCACGTCCTTG      |
| Gfap pre mRNA      | Rv       | CTCAGATCACCACGTCCTTG      |
| Osmr mRNA, premRNA | Fw       | ACACCAAGTCCCTTCCACAG      |
| Osmr mRNA          | Rv       | ATGGTGACATTGGAGCCTTC      |
| Osmr pre mRNA      | Rv       | TGGCAATCCAGTGTCTTTCA      |
| Gapdh mRNA Fw      | Fw       | ACCACAGTCCATGCCATCAC      |
| Gapdh mRNA Rv      | Rv       | TCCACCACCCTGTTGCTGTA      |
|                    |          |                           |
|                    |          |                           |
| <b>ChIP</b>        |          |                           |
| Name               | Fw or Rv | Sequence(5'→3')           |
| Gfap STB           | Fw       | GCCCACGAGTGACTCACCTTG     |
| Gfap STB           | Rv       | CCAGGATGCCAGGATGTCAG      |
| Osmr STB           | Fw       | CAGGAGTGCCAAAAGTGCTC      |
| Osmr STB           | Rv       | ACGTCTGTCCAGGCGTGT        |
| Pou3f4             | Fw       | CTGCCAAGGAAGCAGGATACAAATG |
| Pou3f4             | Rv       | TTCCATCAGAGGTCTCTCCACTATG |
| CD4                | Fw       | CTGCACTCGCCACTTCAGTA      |
| CD4                | Rv       | GGTTGACAACCTCGGGAGAAA     |
| Socs3 SBS          | Fw       | GCACAGCCTTTCAGTGCAGAG     |
| Socs3 SBS          | Rv       | GTATTTACCCGGCCAGTACGC     |
| Gapdh              | Fw       | CTGCACCTGCTACAGTGCTC      |
| Gapdh              | Rv       | GGAAGGGAGAAAAGGCATTC      |
|                    |          |                           |
| <b>RNA FISH</b>    |          |                           |
| Gfap Exon1         | Fw       | GCAGGATGGAGCGGAGAC        |
| Gfap Exon6         | Rv       | GCTCTAGGGACTCGTTCGT       |
| Gfap Exon6         | Fw       | GTTACCAGGAGGCACTTGCT      |
| Gfap last Exon     | Rv       | CCTGCAGCCTAAGCAGAGA       |

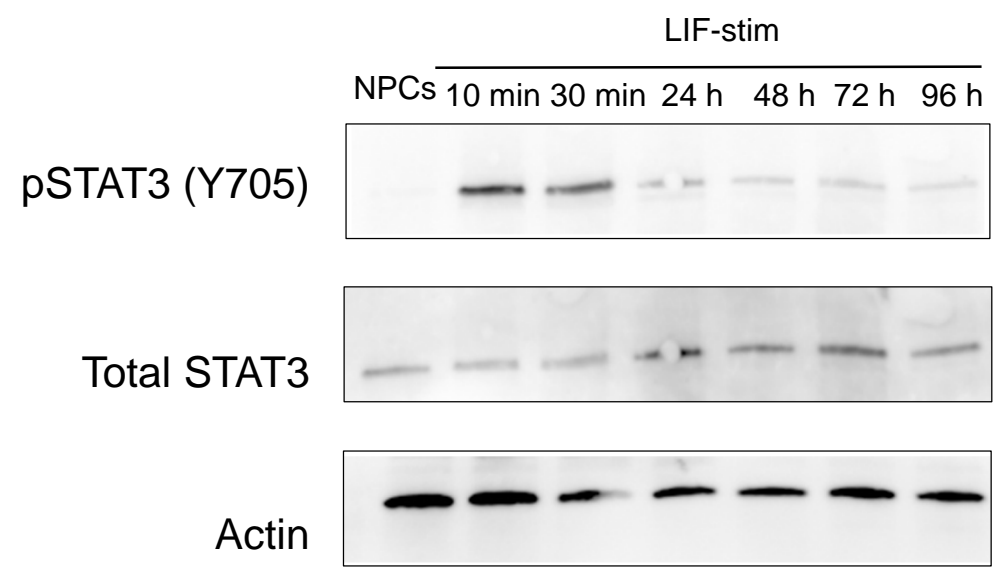

Supplementary Figure 1. STAT3 is immediately phosphorylated by LIF stimulation. Western blotting for pSTAT3 and total STAT3 in NPCs alone and stimulated with LIF for different periods of time (LIF-stim).

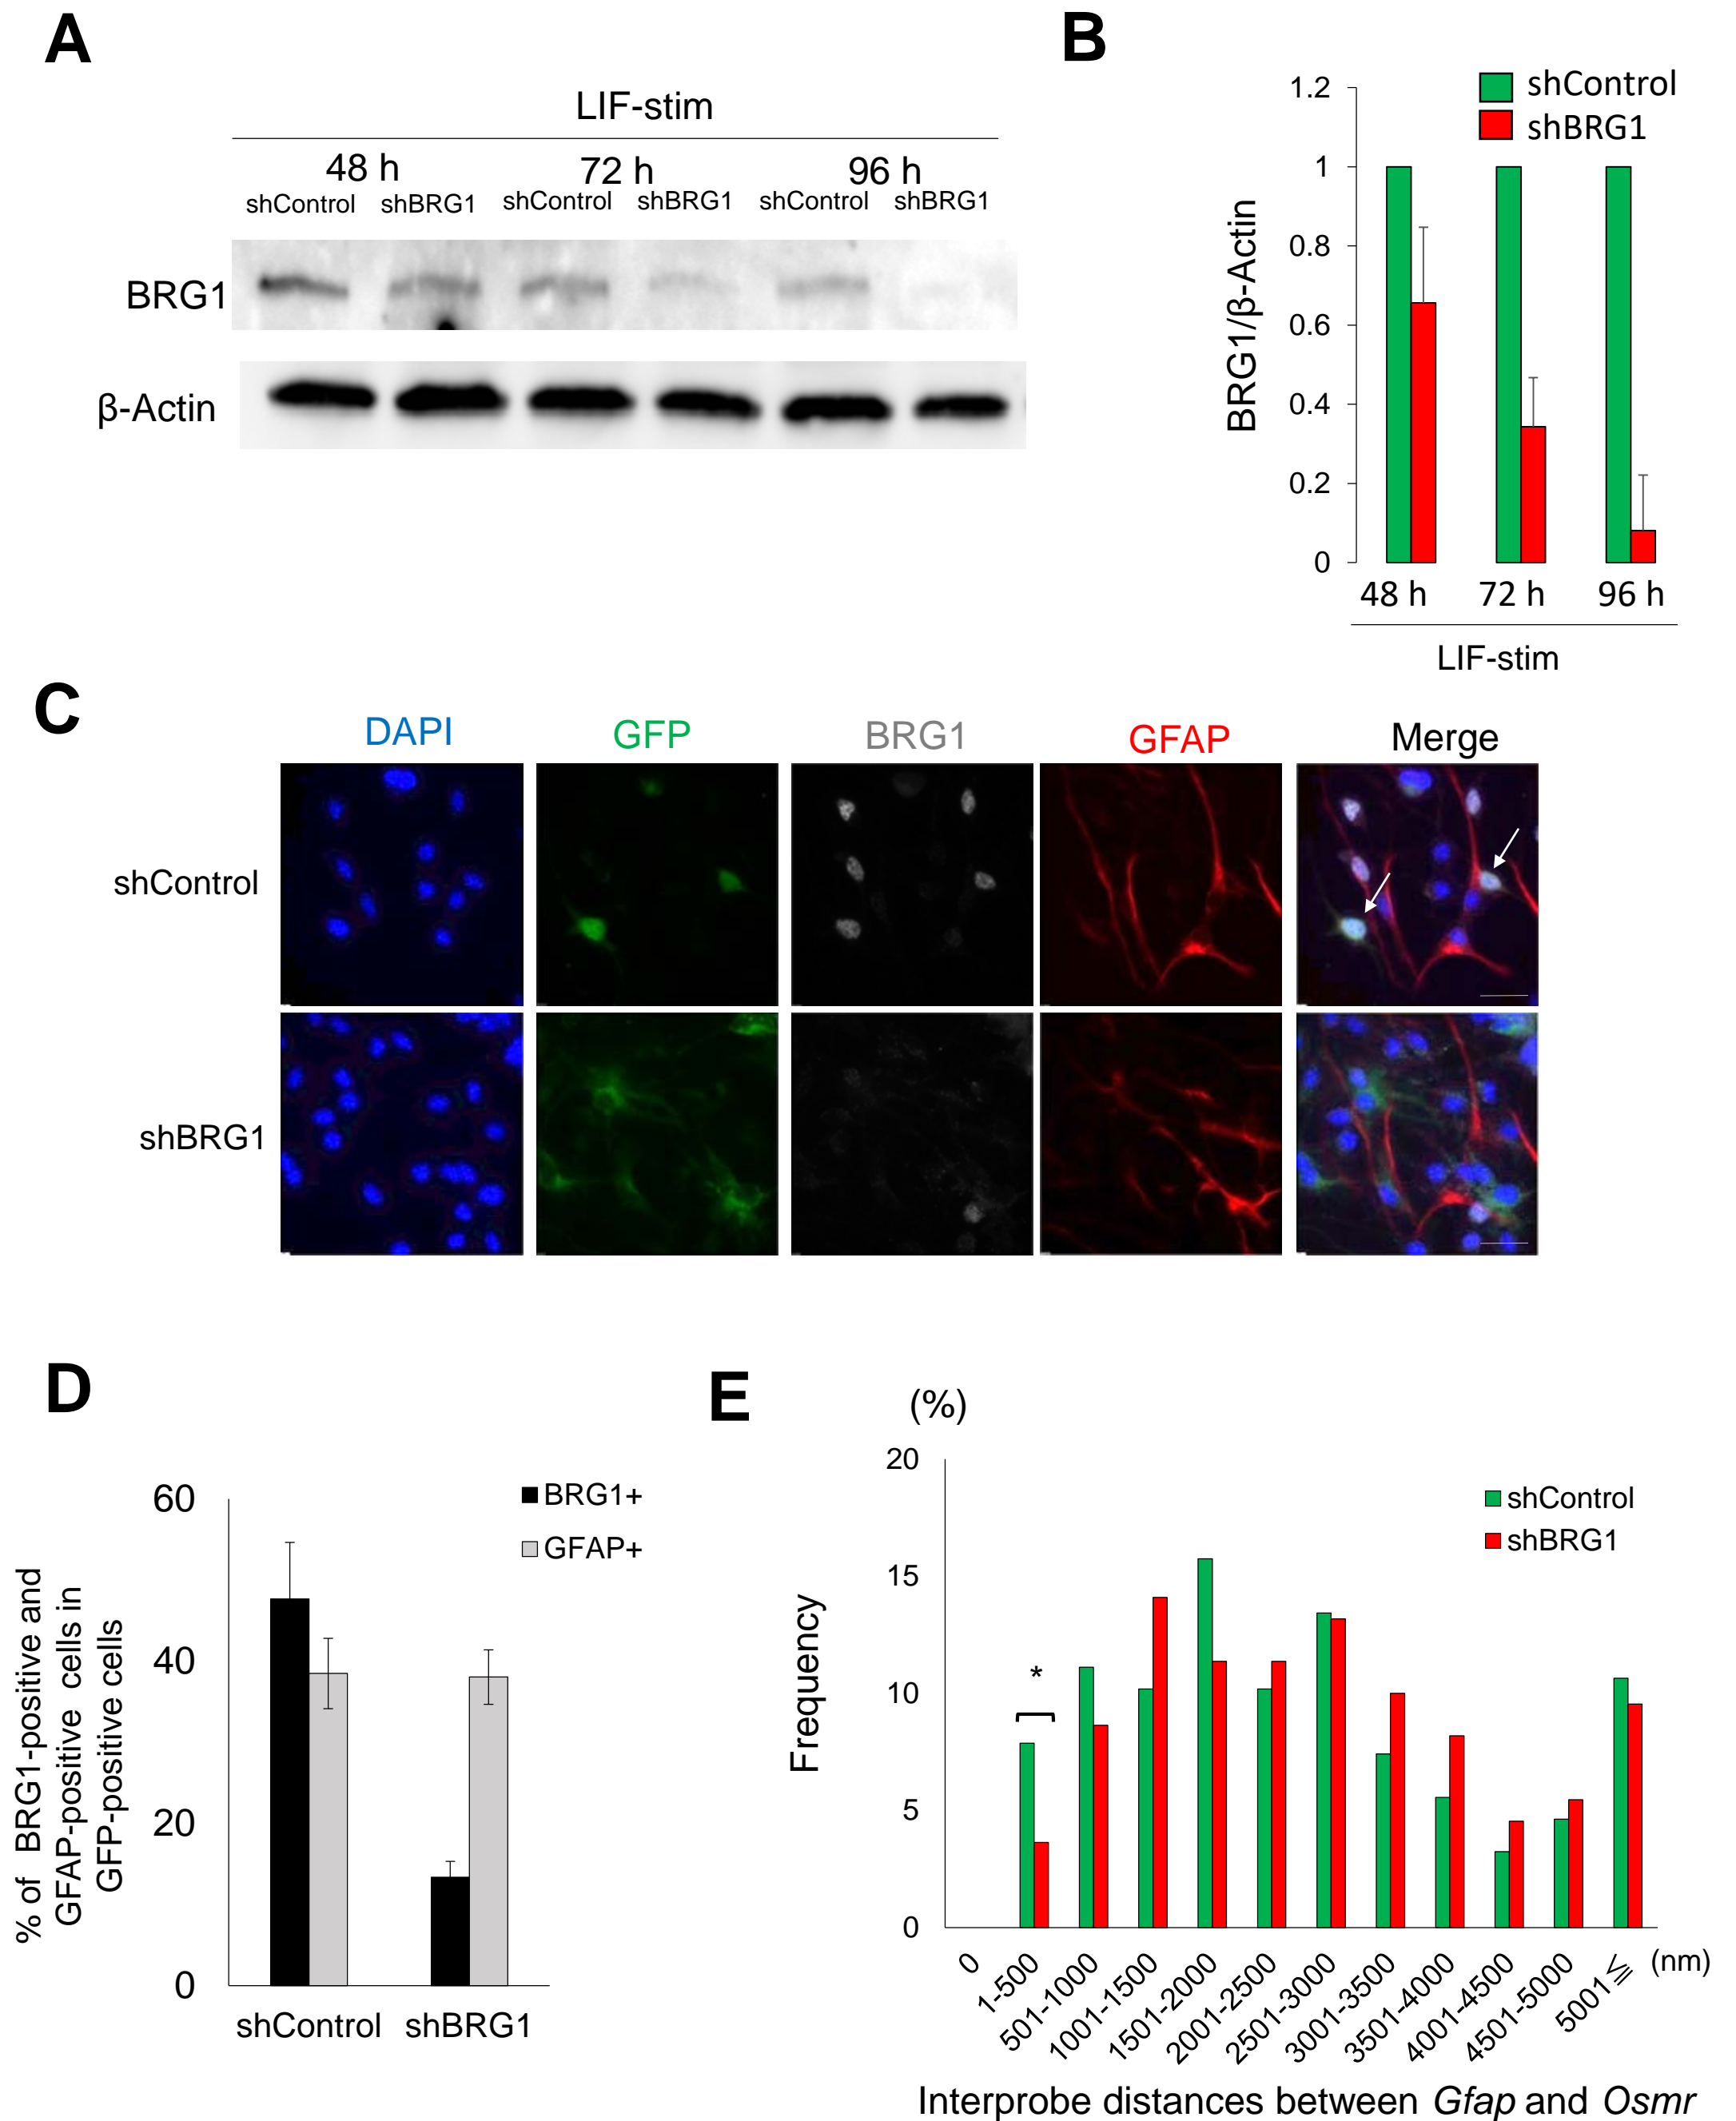

Supplementary Figure2. Confirmation of BRG1 knockdown in LIF-stimulated cells. (A) NPCs were infected with shControl or shBRG1 retrovirus; stimulated with LIF for 48, 72, or 96 h; and then collected and used for western blotting for BRG1. (B) Quantification of BRG1 expression, normalized against that of actin and described as a ratio to the expression in the control at each time point. (C) Cells stimulated with LIF for 96 h were stained with an anti-GFP antibody (green), anti-BRG1 antibody (gray), anti-GFAP antibody (red), and DAPI (blue). Scale bar = 20  $\mu$ m. Arrows indicate GFP/BRG1 double-positive cells. (D) Quantification of the percentage of BRG1-positive and GFAP-positive cells among GFP-positive cells. Error bars represent the standard deviation with  $n = 3$  biological replicates (means  $\pm$  SEM). The Mann-Whitney U test was performed. \* $P < 0.05$ . (E) Distribution of interprobe distances between *Gfap* and *Osmr* in shControl- and shBRG1-expressing LIF-stimulated cells. Fisher's exact test was performed for each distance.  $N = 216$  \* $P < 0.05$ .

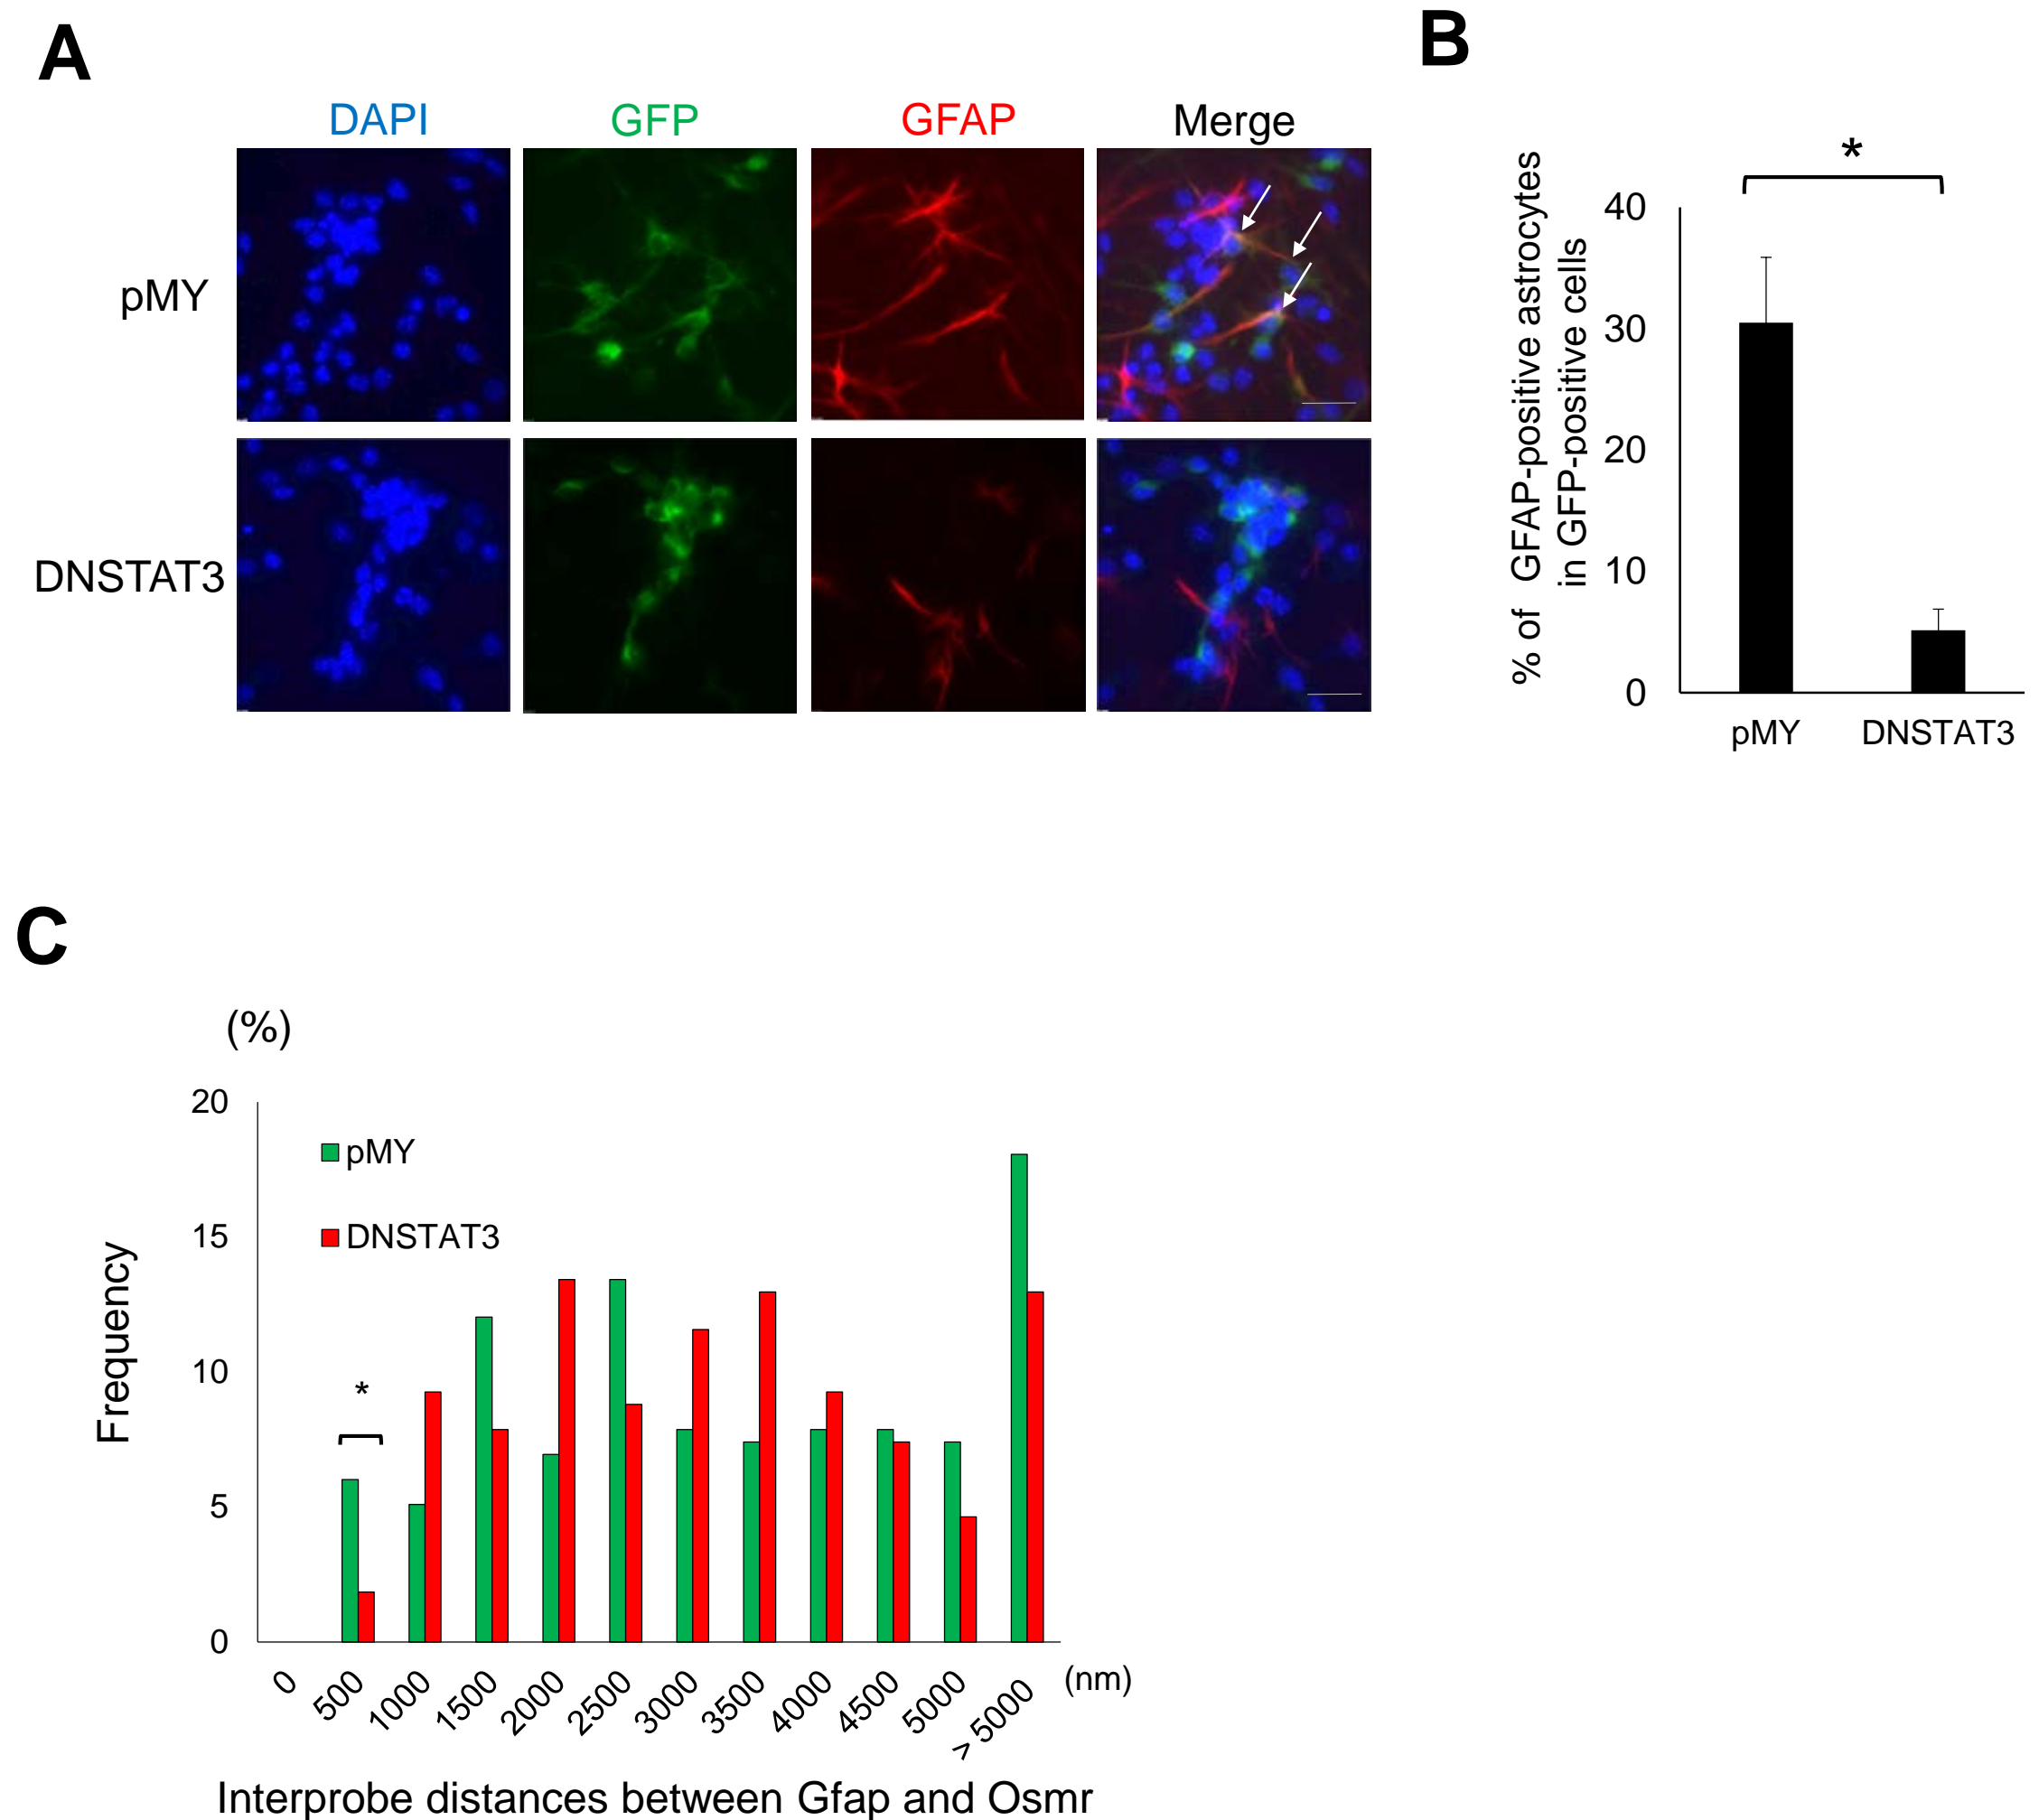

Supplementary Figure 3. JAK-STAT signaling is inhibited in LIF-stimulated cells. (A) NPCs were infected with recombinant retroviruses engineered to express EGFP alone (pMY) or together with DN-STAT3 and stimulated with LIF for 96 h. The cells were then stained with an anti-GFP antibody (green), anti-GFAP antibody (red), and DAPI (blue). Scale bar = 20  $\mu$ m. Arrows indicate GFP/GFAP double-positive cells. (B) Quantification of the percentage of GFAP-positive astrocytes among GFP-positive cells. Error bars represent the standard deviation with three biological replicates (means  $\pm$  SEM). The Mann-Whitney U test was performed and \* $P < 0.05$ . (C) Distribution of interprobe distances between *Gfap* and *Osmr* in LIF-stimulated cells that were infected with recombinant retroviruses engineered to express EGFP alone (pMY) or together with DN-STAT3. Fisher's exact test was performed for each distance.  $N = 216$ . \* $P < 0.05$ .

**A**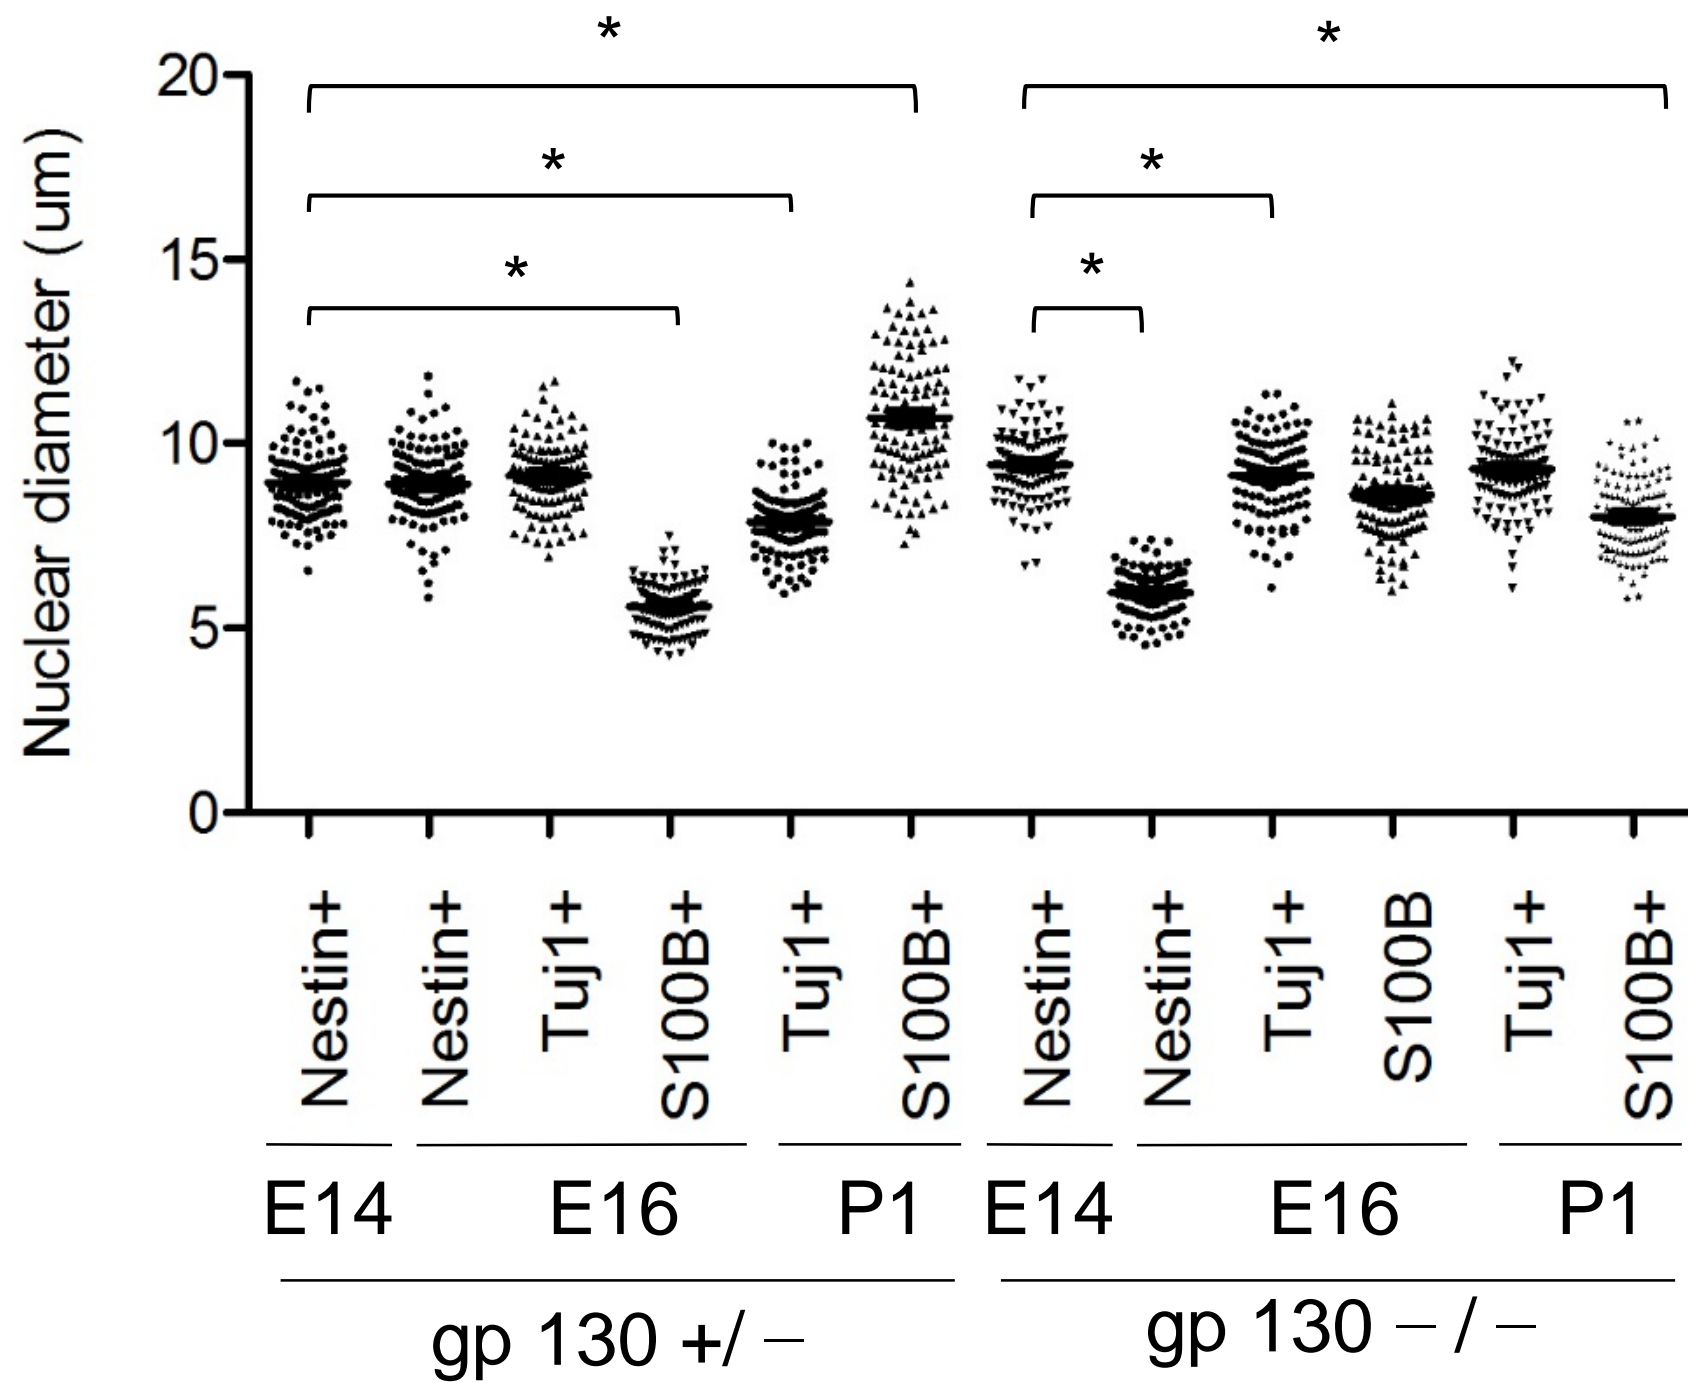**B**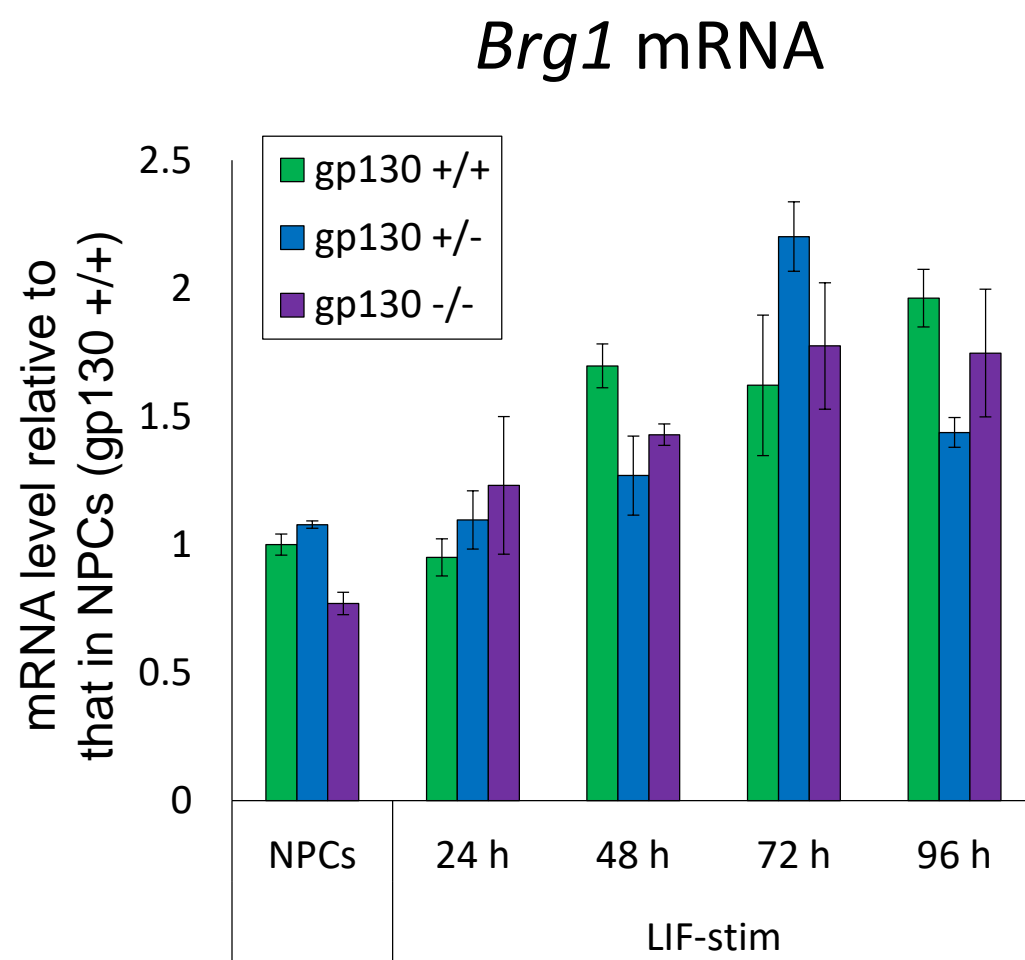

Supplementary Figure 4. Confirmation of gp130 knockout. (A) Nuclear diameter of gp130 +/- and -/- cells. Nuclear size as measured by DAPI staining in E14 and E16 Nestin-positive NPCs, in E16 and P1 Tuj1-positive neurons, and in E16 and P1 S100 $\beta$ -positive astrocytes of gp130 +/- and -/- mice. The Steel test was performed, and \* P < 0.05. n = 108. (B) Quantitative RT-PCR was performed on mRNA of *Brg1* in NPCs derived from gp130 +/+, +/- and -/- mice, either left untreated or stimulated with LIF for different periods of time (LIF-stim). The results were normalized to *Gapdh* expression. Each graph represents the mean ( $\pm$  SEM) relative to the amounts in NPCs derived from gp130 +/- mice from at least three experiments.
